# Supplementary material
Source: Springer Nature journal article supplement (https://www.springermedizin.de/resource/supplementary/12936_2012_2613_MOESM3_ESM.pdf/9545136)

*P* value > 0.05

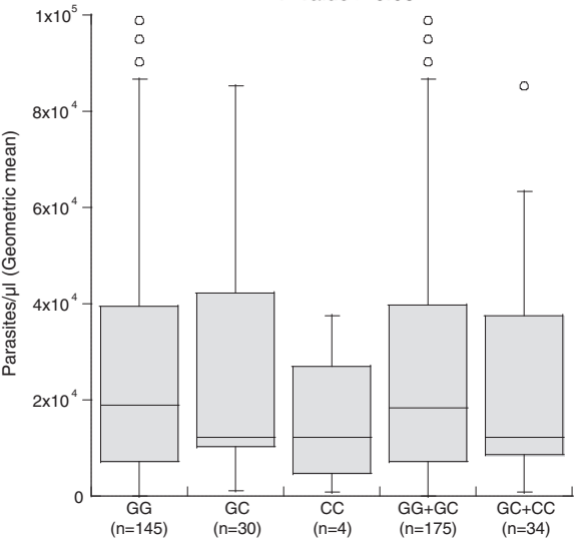

Supplement: MOESM3 [file 9545136]
